## Correction

# Correction: Unpuzzling COVID-19: tissue-related signaling pathways associated with SARS-CoV-2 infection and transmission

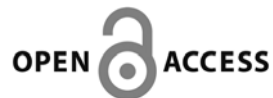

The authors of the original article “Unpuzzling COVID-19: tissue-related signaling pathways associated with SARS-CoV-2 infection and transmission” (Clin Sci (Lond) (2020) 134(16), DOI: 10.1042/CS20200904) would like to correct Figures 2 and 3 of their article as they have noted that these were inverted at article submission. The figures are presented with their correct order here.

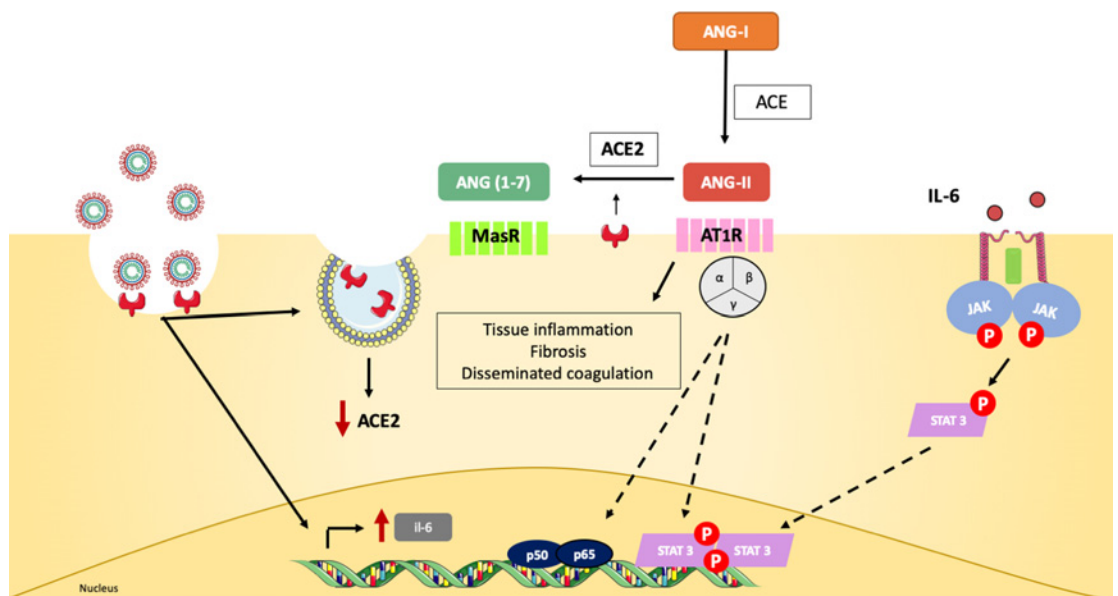

**Figure 2. Canonical ACE2 pathway links multiple organ damage in COVID-19**

SARS-CoV-2 infection down-regulates ACE2 expression and leads to the production of pro-inflammatory mediators, such as IL-6 [1]. Angiotensin-I (Ang-I) is converted into Ang-II by the ACE in the extracellular space. ACE2 is able to further cleave Ang-II to Ang(1-7), which binds MasR receptors on the cell surface and promotes anti-inflammatory, vasodilation and anti-fibrotic effects [1]. Since ACE2 is down-regulated during viral infection, this event will lead to the accumulation of Ang-II and binding to AT1R receptors on cellular membrane. AT1R signals through JAK-STAT and induces fibrosis, pro-inflammatory gene expression and vasoconstriction [2,3]. Multiple organs express ACE2 and are target for SARS-CoV-2. As they lose ACE2-mediated protection, Ang-II signaling contributes to the pathological findings observed in COVID-19 patients, such as disseminated coagulopathy and acute tissue damage [4].

Correction published:  
09 September 2020

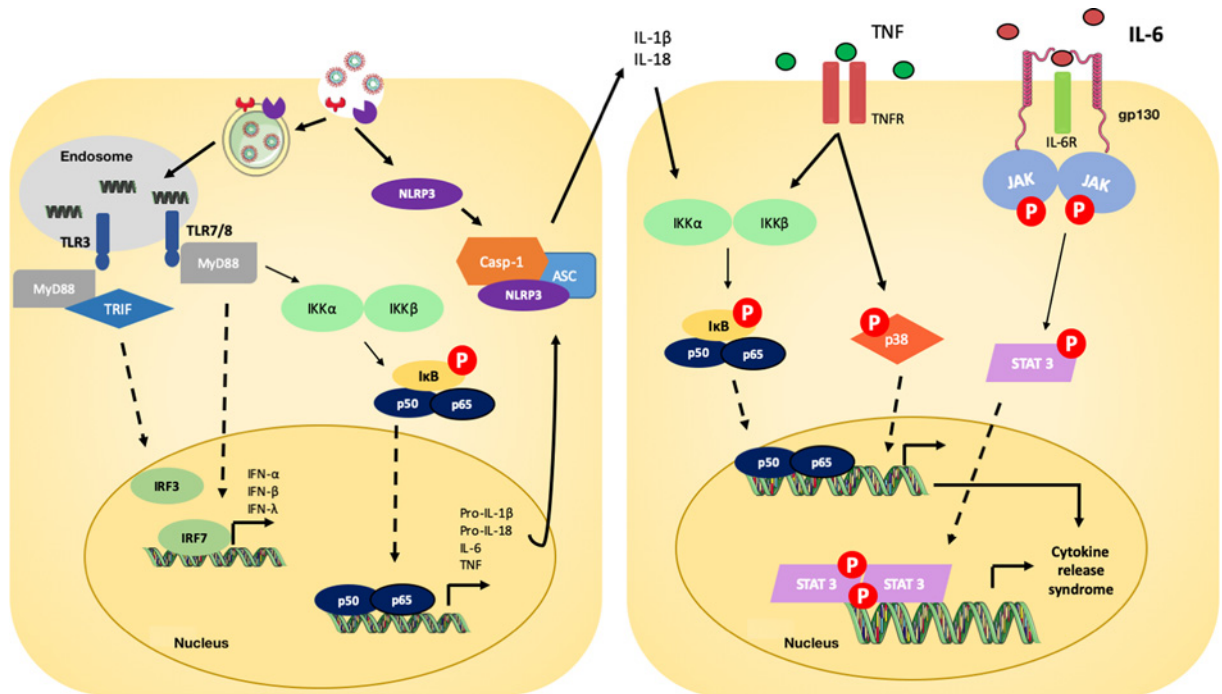

**Figure 3. Signaling pathways involved in COVID-19 pathophysiology**

Toll-like receptors (TLRs) 3 and TLR 7/8 recognize SARS-CoV-2 RNA and initiate the inflammatory cascade via type I and type II IFN gene expression and NF-κB nuclear translocation [5,6]. Via NF-κB, the expression of multiple pro-inflammatory genes is stimulated, including pro-IL-1β, pro-IL-18, TNF and IL-6 [7–9]. The virus is also recognized by cytoplasmic NLRP3, which forms, together with ASC and caspase-1 (Casp-1), the inflammasome complex that will cleave and release mature forms of IL-1β and IL-18 [10]. The cytokines IL-1β, IL-18 and TNF bind to specific receptors and promote further NF-κB nuclear translocation and phosphorylation of p38 MAPK, which will lead to great expression of pro-inflammatory cytokines and chemokines [11,12]. IL-6, an important player in COVID-19, binds IL-6R and gp130 receptors to activate JAK/STAT-3 pathway and then contribute to the CRS observed in COVID-19 patients [13].

The authors apologise for any inconvenience caused to the reader.

## References

- Gheblawi, M., Wang, K., Viveiros, A., Nguyen, Q., Zhong, J.-C., Turner, A.J. et al. (2020) Angiotensin-converting enzyme 2: SARS-CoV-2 receptor and regulator of the renin-angiotensin system: celebrating the 20th anniversary of the discovery of ACE2. *Circ. Res.* **126**, 1456–1474, <https://doi.org/10.1161/CIRCRESAHA.120.317015>
- Perrotta, F., Matera, M.G., Cazzola, M. and Bianco, A. (2020) Severe respiratory SARS-CoV2 infection: Does ACE2 receptor matter? *Respir. Med.* **168**, 105996, <https://doi.org/10.1016/j.rmed.2020.105996>
- Groß, S., Jahn, C., Cushman, S., Bär, C. and Thum, T. (2020) SARS-CoV-2 receptor ACE2-dependent implications on the cardiovascular system: From basic science to clinical implications. *J. Mol. Cell Cardiol.* **144**, 47–53, <https://doi.org/10.1016/j.yjmcc.2020.04.031>
- Tian, S., Xiong, Y., Liu, H., Niu, L., Guo, J., Liao, M. et al. (2020) Pathological study of the 2019 novel coronavirus disease (COVID-19) through postmortem core biopsies. *Mod. Pathol.* 10–12
- Sabroe, I., Parker, L.C., Dower, S.K. and Whyte, M.K.B. (2008) The role of TLR activation in inflammation. *J. Pathol.* **214**, 126–135, <https://doi.org/10.1002/path.2264>
- Totura, A.L., Whitmore, A., Agnihotram, S., Schäfer, A., Katze, M.G., Heise, M.T. et al. (2015) Toll-like receptor 3 signaling via TRIF contributes to a protective innate immune response to severe acute respiratory syndrome coronavirus infection. *MBio* **6**, 1–14, <https://doi.org/10.1128/mBio.00638-15>
- Li, Q. and Verma, I.M. (2002) NF-κB regulation in the immune system. *Nat. Rev. Immunol.* **2**, 725–734, <https://doi.org/10.1038/nri910>
- Tergaonkar, V., Correa, R.G., Ikawa, M. and Verma, I.M. (2005) Distinct roles of IκB proteins in regulating constitutive NF-κB activity. *Nat. Cell Biol.* **7**, 921–923, <https://doi.org/10.1038/ncb1296>
- Tergaonkar, V. (2006) NFκB pathway: A good signaling paradigm and therapeutic target. *Int. J. Biochem. Cell Biol.* **38**, 1647–1653, Available from: <https://linkinghub.elsevier.com/retrieve/pii/S1357272506001245>, <https://doi.org/10.1016/j.biocel.2006.03.023>
- Zhao, C. and Zhao, W. (2020) NLRP3 Inflammasome — A Key Player in Antiviral Responses. **11**, 1–8

- 11 Grimes, J.M. and Grimes, K.V. (2020) p38 MAPK inhibition: A promising therapeutic approach for COVID-19. *J. Mol. Cell Cardiol.* **144**, 63–65, <https://doi.org/10.1016/j.yjmcc.2020.05.007>
- 12 Feng, Y., Fang, Z., Liu, B. and Zheng, X. (2019) P38MAPK plays a pivotal role in the development of acute respiratory distress syndrome. *Clinics* **74**, 1–5, <https://doi.org/10.6061/clinics/2019/e509>
- 13 Zhang, C., Wu, Z., Li, J.W., Zhao, H. and Wang, G.Q. (2020) The cytokine release syndrome (CRS) of severe COVID-19 and Interleukin-6 receptor (IL-6R) antagonist Tocilizumab may be the key to reduce the mortality. *Int. J. Antimicrob. Agents* **55**, <https://doi.org/10.1016/j.ijantimicag.2020.105954>
